# Supplementary material for: An excellent water-stable 3D Zn-MOF with 8-fold interpenetrated diamondoid topology showing “turn-on/turn-off” luminescent detection of Al3+ and SNT in aqueous media
Source: Royal Society of Chemistry journal article supplement (doi:10.1039/d1ra06590d), 2021-01-01
Supplement: d1ra06590d1.pdf [file d1ra06590d1.pdf]

## Electronic Supporting Information

### **An excellent water-stable 3D Zn-MOF with 8-fold interpenetrated diamond topology showing “Turn-On/Turn-Off” luminescent detection of Al<sup>3+</sup> and SNT in aqueous media**

**†Xiuting Gao,<sup>a</sup> †Xiaohe Wang,<sup>a</sup> Miaomiao Feng,<sup>a</sup> Ming Yang,<sup>b</sup> Qingfu Zhang<sup>\*a</sup>**

<sup>a</sup> College of Chemistry and Chemical Engineering, Liaocheng University, Liaocheng 252059, China

<sup>b</sup> Fujian Institute of Research on the Structure of Matter, Chinese Academy of Sciences, Fuzhou 350002, China

†X. T. Gao and X. H. Wang contributed equally to this paper

\*Corresponding author: Q. F. Zhang, E-mail: zhangqingfu@lcu.edu.cn

## Supplementary Figures

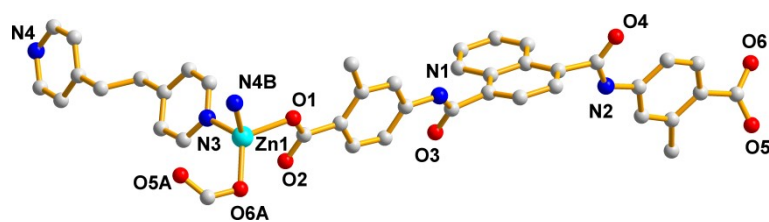

**Fig. S1** Coordination environment of Zn(II) in **1**, the isolated H<sub>2</sub>O molecules, isolated DMF molecule and H atoms are omitted for clarity. (A:  $x-3/2, -y+1/2, z-1/2$ ; B:  $x-1/2, -y+3/2, z+1/2$ )

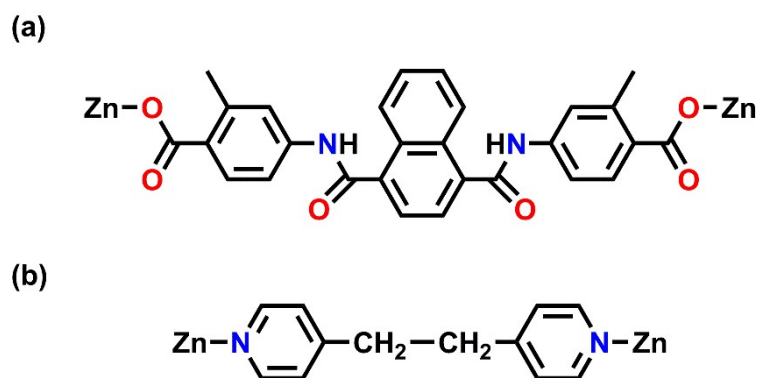

**Fig. S2** (a) Coordination modes of carboxylate groups in L<sup>2-</sup> ligand. (b) Coordination modes of N atoms in dpe ligand.

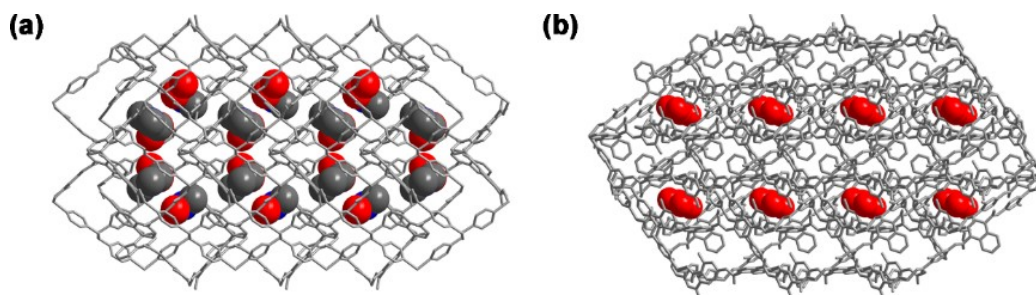

**Fig. S3** Solvent molecules of DMF and H<sub>2</sub>O in **1** are represented as space filling spheres along the [101] (a) and [0-11] (b) directions.

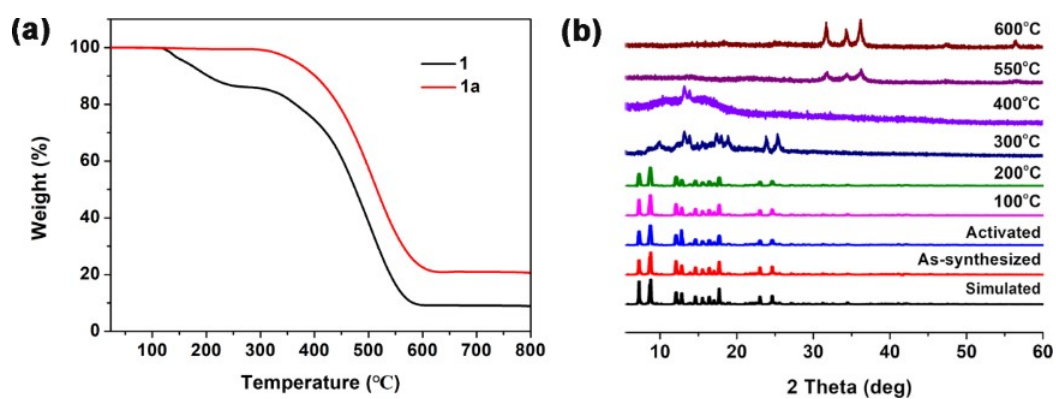

Fig. S4 (a) TGA curves of **1** and **1a**. (b) Variable-temperature PXRD patterns for **1**.

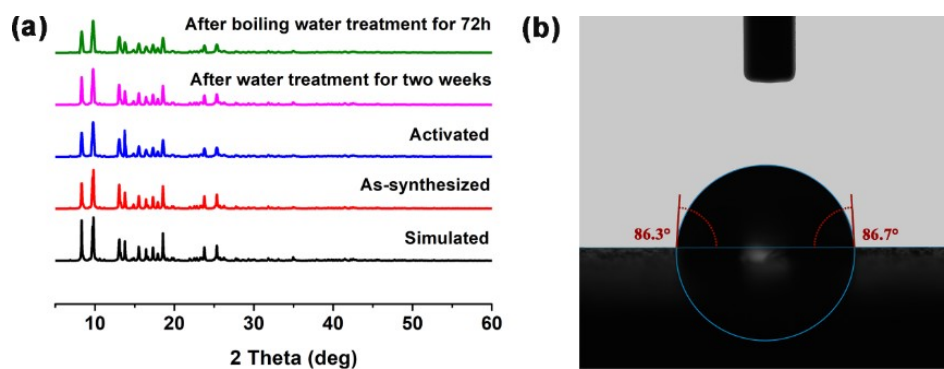

Fig. S5 (a) PXRD patterns of simulated, as-synthesized, activated, as well as **1a** after immersion in water and boiling water. (b) Water contact angle of **1a**.

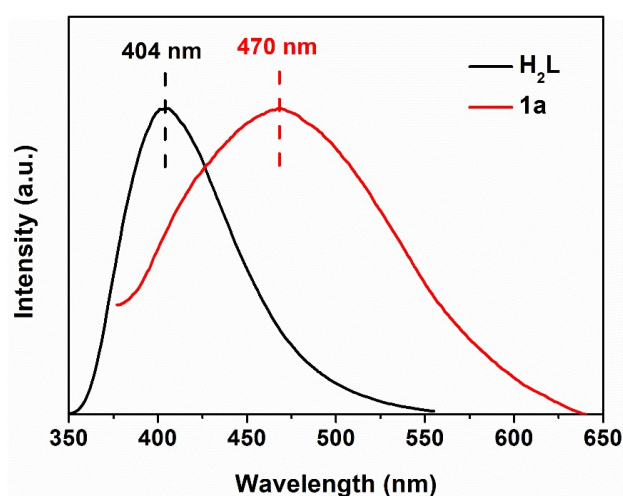

Fig. S6 The emission spectrum of H<sub>2</sub>L ligand and **1a** dispersed in water at room temperature.

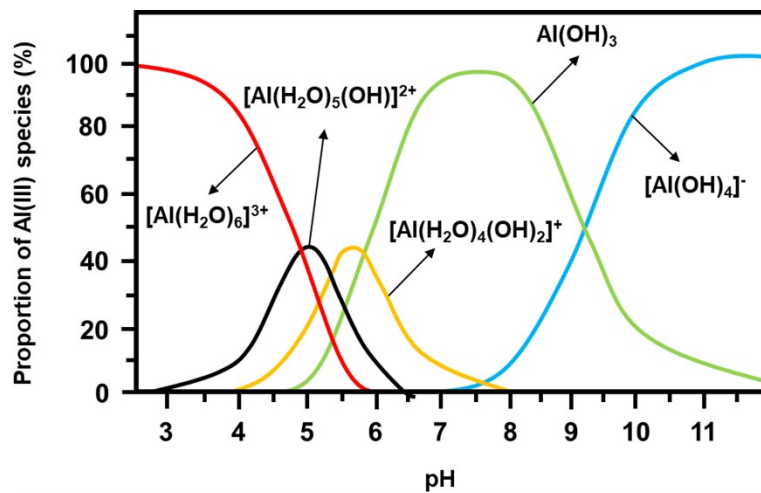

Fig. S7 The pH-dependence of various Al(III) species in aqueous solution.

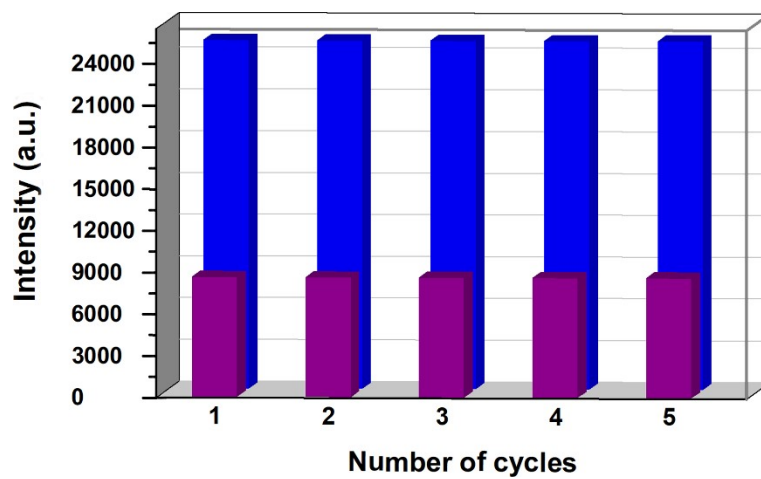

Fig. S8 Recyclability experiments of **1a** implemented with  $Al^{3+}$ .

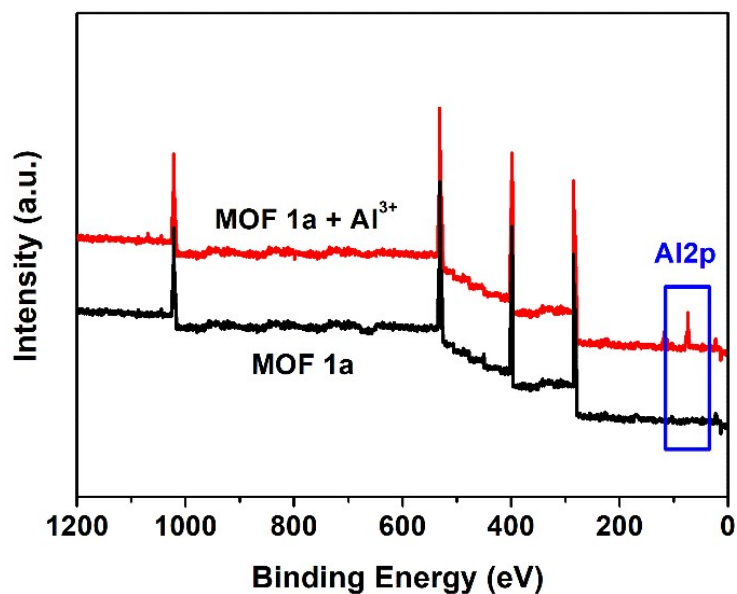

Fig. S9 XPS spectra of **1a** and **1a+Al<sup>3+</sup>**.

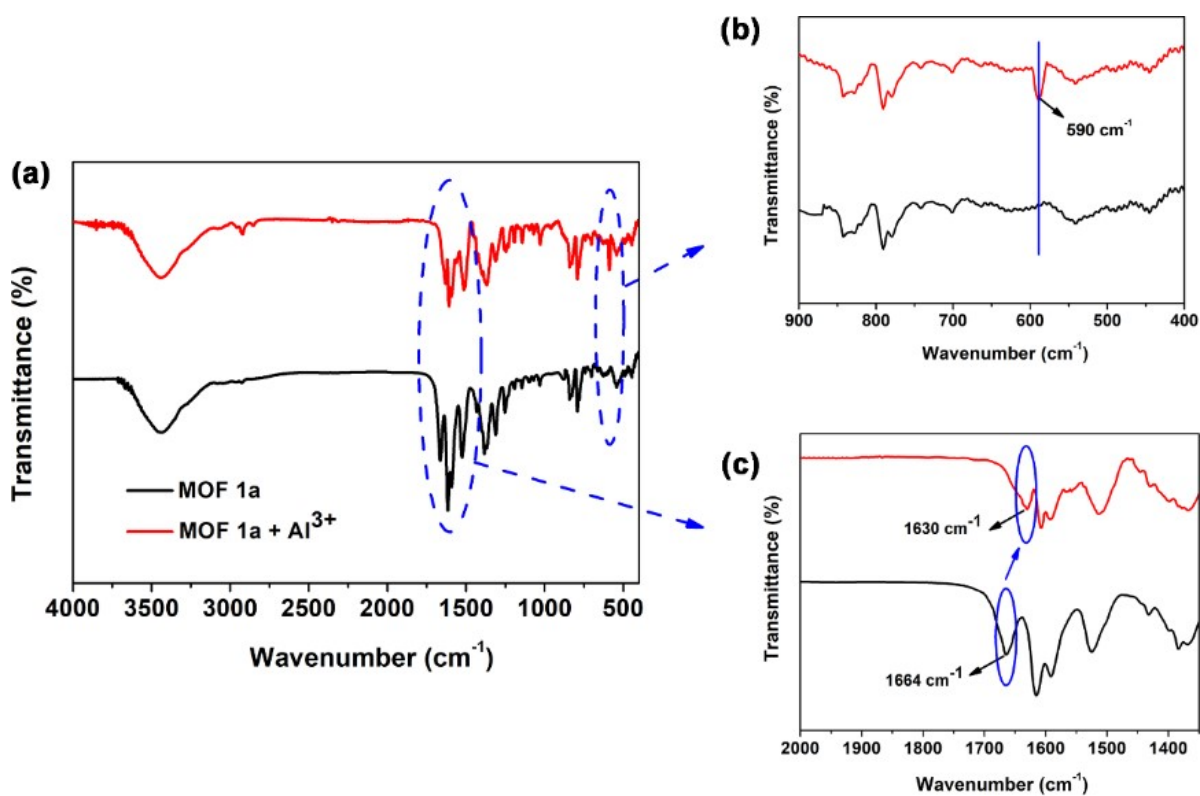

Fig. S10 IR spectra of **1a** and **1a+Al<sup>3+</sup>**.

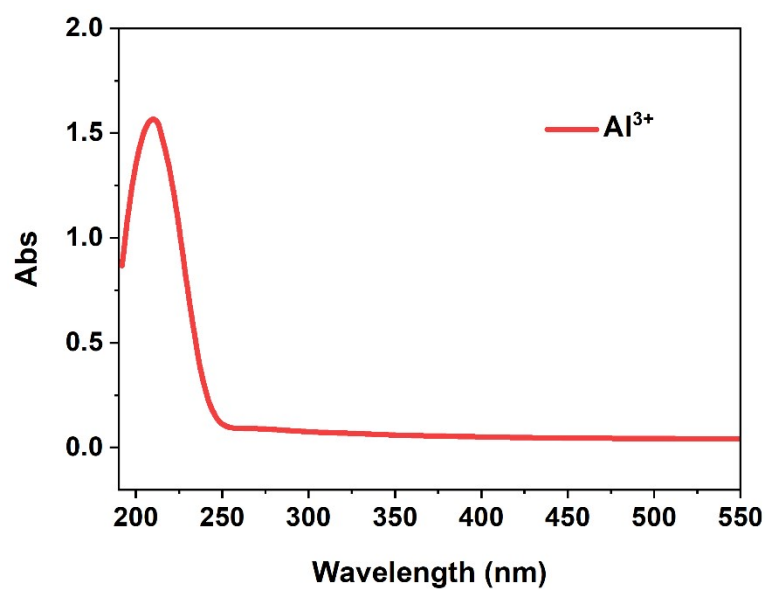

**Fig. S11** Absorption spectra of Al<sup>3+</sup> in the concentration of 10<sup>-5</sup> mol·L<sup>-1</sup> in aqueous solution.

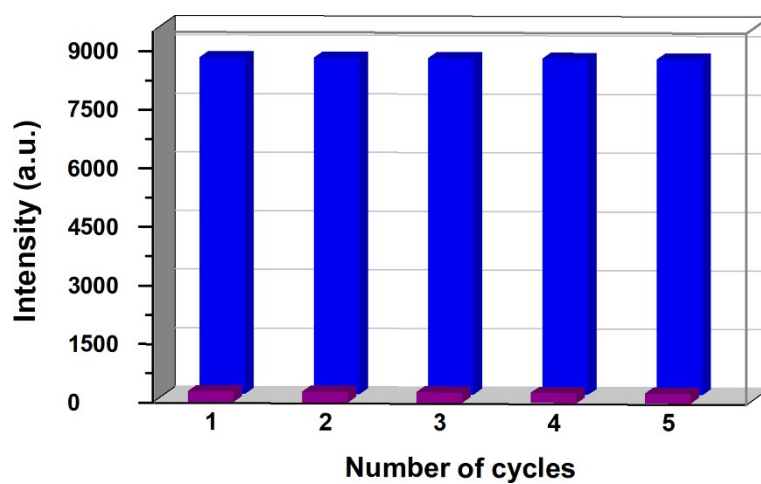

**Fig. S12** Recyclability experiment of **1a** implemented with SNT.

## Supplementary Tables

**Table S1.** Crystal data and structure refinement parameters for **1**.

|                                                     |                                                                   |
|-----------------------------------------------------|-------------------------------------------------------------------|
| Empirical formula                                   | C <sub>43</sub> H <sub>45</sub> N <sub>5</sub> O <sub>10</sub> Zn |
| Formula weight                                      | 857.25                                                            |
| Temperature (K)                                     | 298(2)                                                            |
| Wavelength (Å)                                      | 0.71073                                                           |
| Crystal system                                      | Monoclinic                                                        |
| Space group                                         | <i>P</i> 2 <sub>1</sub> / <i>n</i>                                |
| <i>a</i> (Å)                                        | 12.811 (1)                                                        |
| <i>b</i> (Å)                                        | 19.034 (2)                                                        |
| <i>c</i> (Å)                                        | 17.420 (2)                                                        |
| $\beta$ (°)                                         | 91.017 (2)                                                        |
| Volume (Å <sup>3</sup> )                            | 4247.0 (7)                                                        |
| <i>Z</i>                                            | 4                                                                 |
| Calculated density (mg·m <sup>-3</sup> )            | 1.341                                                             |
| Absorption coefficient (mm <sup>-1</sup> )          | 0.641                                                             |
| <i>F</i> (000)                                      | 1792                                                              |
| Crystal size (mm)                                   | 0.42 × 0.26 × 0.10                                                |
| Theta range for data collection (°)                 | 2.4385 to 21.593                                                  |
| Limiting indices                                    | -15 ≤ <i>h</i> ≤ 12, -22 ≤ <i>k</i> ≤ 17, -20 ≤ <i>l</i> ≤ 18     |
| Reflections collected/unique                        | 19558/7426 [R <sub>int</sub> = 0.084]                             |
| Completeness to $\vartheta = 25.02^\circ$           | 99.1%                                                             |
| Data/restraints/parameters                          | 7426/0/536                                                        |
| Goodness-of-fit on <i>F</i> <sup>2</sup>            | 1.073                                                             |
| Final <i>R</i> indices [ <i>I</i> > 2σ( <i>I</i> )] | <i>R</i> <sub>1</sub> = 0.065, <i>wR</i> <sub>2</sub> = 0.109     |

**Table S2.** Selected bond lengths (Å) and angles (°) for **1**.

| Bond lengths |             |             |             |
|--------------|-------------|-------------|-------------|
| Zn1—O1       | 1.973 (3)   | Zn1—O6A     | 1.962 (3)   |
| Zn1—N3       | 2.013 (4)   | Zn1—N4B     | 2.044 (3)   |
| Bond angles  |             |             |             |
| O6A—Zn1—O1   | 115.49 (13) | O1—Zn1—N4B  | 96.44 (15)  |
| O6A—Zn1—N3   | 121.11 (16) | N3—Zn1—N4B  | 106.44 (14) |
| O1—Zn1—N3    | 107.46 (14) | O6A—Zn1—N4B | 106.62 (13) |

Symmetry codes: A:  $x-3/2, -y+1/2, z-1/2$ ; B:  $x-1/2, -y+3/2, z+1/2$ ; C:  $x+3/2, -y+1/2, z+1/2$ .

**Table S3.** The LOD comparison of **1a** and some reported MOF sensors toward Al<sup>3+</sup>.

| MOFs                                              | Analyte          | LOD (ppb) | Ref.      |
|---------------------------------------------------|------------------|-----------|-----------|
| UiO-66-NH <sub>2</sub> -SA                        | Al <sup>3+</sup> | 930.7     | S1        |
| Zn(DMA)(TBA)                                      | Al <sup>3+</sup> | 262.7     | S2        |
| NUM-2                                             | Al <sup>3+</sup> | 100.0     | S3        |
| [Co(OBA)(DATZ) <sub>0.5</sub> (H <sub>2</sub> O)] | Al <sup>3+</sup> | 57.5      | S4        |
| MOF <b>1a</b>                                     | Al <sup>3+</sup> | 41.9      | This work |



**Table S4.** HOMO and LUMO energies for the selected antibiotics by DFT calculations.

| Analytes | HOMO (ev) | LUMO (ev) |
|----------|-----------|-----------|
| SNT      | -8.198    | -1.171    |
| AZM      | -4.080    | -0.850    |
| ROX      | -4.710    | -0.850    |
| SDZ      | -7.564    | 0.016     |
| SMX      | -7.599    | 0.126     |
| SMZ      | -7.507    | 0.218     |
| GEN      | -6.330    | 1.360     |

**Table S5.** Al<sup>3+</sup> and SNT determination in tap water, Dongchang Lake and Yellow River.

| Samples        | Analyte          | Added [ $\mu$ M] | Found [ $\mu$ M] | Recovery [%] | RSD [%] |
|----------------|------------------|------------------|------------------|--------------|---------|
| Tap water      | Al <sup>3+</sup> | 0                | not detected     | —            | —       |
|                |                  | 20               | 20.48            | 102.4        | 2.1     |
|                |                  | 40               | 37.46            | 93.7         | 1.9     |
|                | SNT              | 0                | not detected     | —            | —       |
|                |                  | 20               | 20.98            | 104.9        | 4.2     |
|                |                  | 40               | 38.13            | 95.3         | 2.6     |
| Dongchang Lake | Al <sup>3+</sup> | 0                | not detected     | —            | —       |
|                |                  | 20               | 21.51            | 107.6        | 2.8     |
|                |                  | 40               | 38.8             | 97.0         | 1.5     |
|                | SNT              | 0                | not detected     | —            | —       |
|                |                  | 20               | 21.18            | 105.9        | 4.8     |
|                |                  | 40               | 38.46            | 96.2         | 2.9     |
| Yellow River   | Al <sup>3+</sup> | 0                | not detected     | —            | —       |
|                |                  | 20               | 20.51            | 102.6        | 3.0     |
|                |                  | 40               | 37.80            | 107.6        | 1.1     |
|                | SNT              | 0                | not detected     | —            | —       |
|                |                  | 20               | 20.85            | 104.2        | 2.7     |
|                |                  | 40               | 39.80            | 99.5         | 2.2     |

## References

- S1. S. Y. Zhu and B. Yan, *Dalton Trans.*, 2018, **47**, 1674-1681.
- S2. X. Zhang, X. Luo, N. X. Zhang, J. Wu and Y. Q. Huang, *Inorg. Chem. Front.*, 2017, **4**, 1888-1894.
- S3. M. H. Yu, T. L. Hu and X. H. Bu, *Inorg. Chem. Front.*, 2017, **4**, 256-260.
- S4. D. K. Singha and P. Mahata, *Inorg. Chem.*, 2015, **54**, 6373-6379.
